# Supplementary material for: Hydrometeorological droughts in the Miño–Limia–Sil hydrographic demarcation (northwestern Iberian Peninsula): the role of atmospheric drivers
Source: Copernicus journal article supplement (doi:10.5194/nhess-20-1805-2020), 2020-06-26
Supplement: Supplementary file 1 [file nhess-20-1805-2020-supplement.pdf]

Supplement of Nat. Hazards Earth Syst. Sci., 20, 1805–1832, 2020  
<https://doi.org/10.5194/nhess-20-1805-2020-supplement>  
© Author(s) 2020. This work is distributed under  
the Creative Commons Attribution 4.0 License.

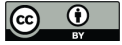

Natural Hazards  
and Earth System  
Sciences Open Access 

*Supplement of*

## **Hydrometeorological droughts in the Miño–Limia–Sil hydrographic demarcation (northwestern Iberian Peninsula): the role of atmospheric drivers**

**Rogert Sorí et al.**

*Correspondence to:* Rogert Sorí (rogert.sori@uvigo.es)

The copyright of individual parts of the supplement might differ from the CC BY 4.0 License.

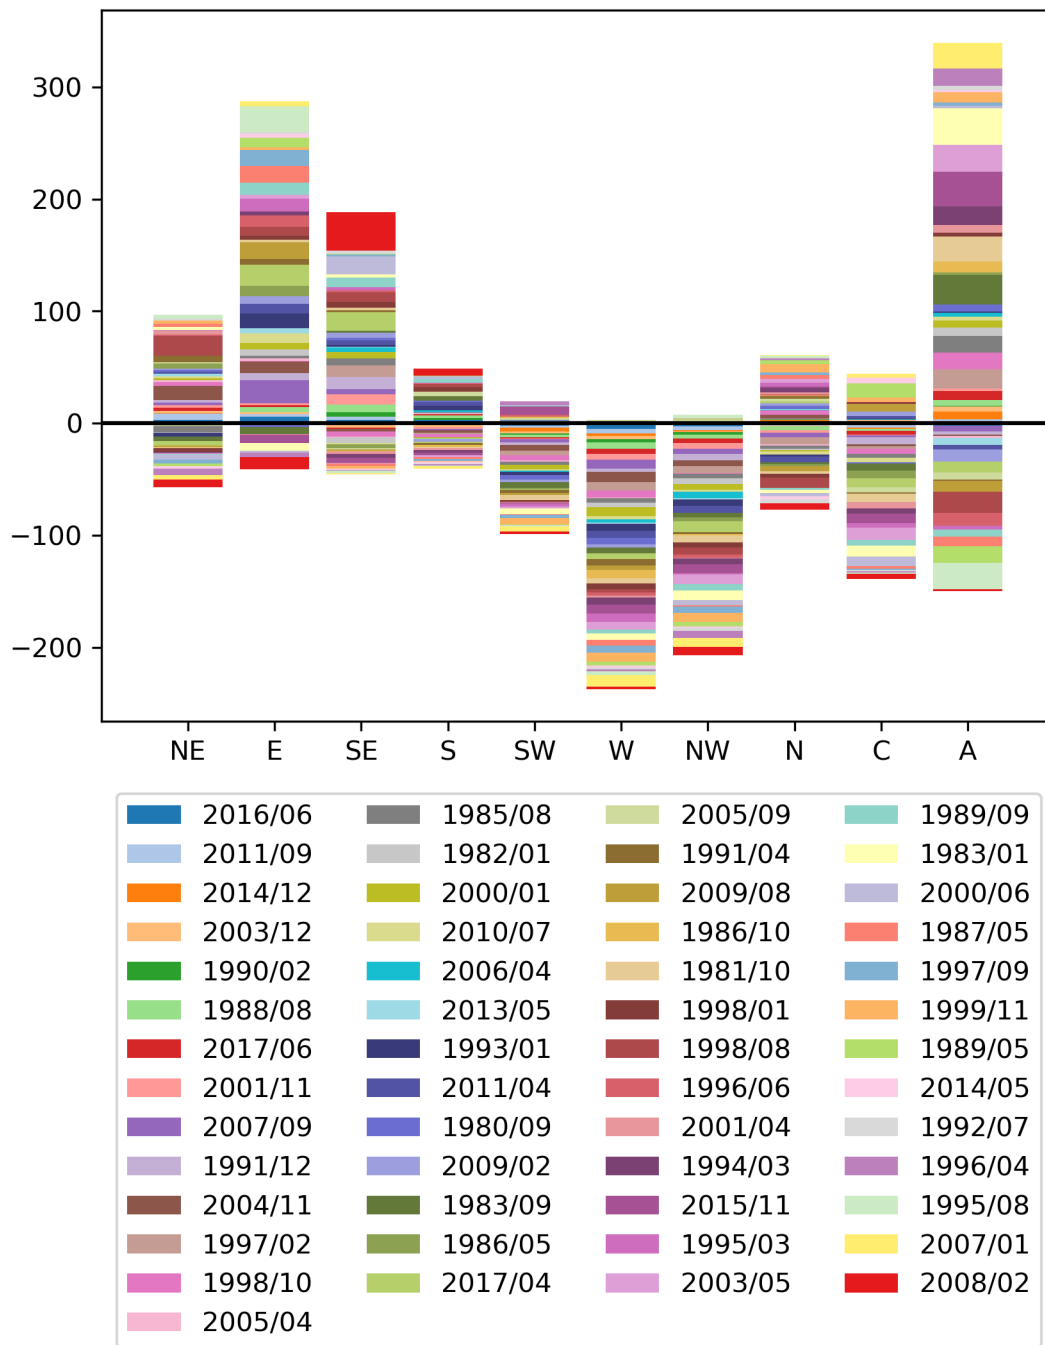

**Figure S1.** The anomaly in the percentage of occurrence of each weather type associated with all drought episodes in the period 1980 – 2017.
